# Supplementary material
Source: ML conference proceedings conference paper supplement (https://proceedings.mlr.press/v37/liuc15.html)
Supplement: Supplementary file [file liuc15-supp.pdf]

---

# Supplementary Material for Bipartite Edge Prediction via Transductive Learning over Product Graphs

---

**Hanxiao Liu**

Carnegie Mellon University, Pittsburgh, PA 15213 USA

HANXIAOL@CS.CMU.EDU

**Yiming Yang**

Carnegie Mellon University, Pittsburgh, PA 15213 USA

YIMING@CS.CMU.EDU

## A. Remarks

Before going through the proofs, we review some useful facts about the Kronecker (Tensor) product. Those properties are commonly used for solving Sylvester equations. More details can be found in *The Matrix Cookbook*.

**Remark 1.**  $(AC) \otimes (BD) = (A \otimes B)(C \otimes D)$

**Remark 2.**  $(A \otimes B)^\top = A^\top \otimes B^\top$

**Remark 3.**  $\text{vec}(BCA^\top) = (B \otimes A)\text{vec}(C)$ <sup>1</sup>

## B. Spectral Graph Products

Let us verify that both the Tensor and Cartesian graph products are members of the Spectral Graph Product (SGP) family. For any graph  $\mathcal{G}$ , we use  $\Lambda_{\mathcal{G}}$  to denote the diagonal matrix consisting of the eigenvalues of its adjacency matrix  $G$ .

### B.1. Tensor Graph Product

Suppose  $x \circ y = xy$ . According to Definition 5, we have

$$[\Lambda_{\mathcal{G} \circ \mathcal{H}}]_{(i,j),(i,j)} = [\lambda_{\mathcal{G}}]_i \circ [\lambda_{\mathcal{H}}]_j = [\lambda_{\mathcal{G}}]_i [\lambda_{\mathcal{H}}]_j \quad (1)$$

which implies  $\Lambda_{\mathcal{G} \circ \mathcal{H}} = \Lambda_{\mathcal{G}} \otimes \Lambda_{\mathcal{H}}$ . Therefore

$$\begin{aligned} G \circ H &= (U_{\mathcal{G}} \otimes U_{\mathcal{H}}) \Lambda_{\mathcal{G} \circ \mathcal{H}} (U_{\mathcal{G}} \otimes U_{\mathcal{H}})^\top \\ &= (U_{\mathcal{G}} \otimes U_{\mathcal{H}}) (\Lambda_{\mathcal{G}} \otimes \Lambda_{\mathcal{H}}) (U_{\mathcal{G}} \otimes U_{\mathcal{H}})^\top \\ &= ((U_{\mathcal{G}} \Lambda_{\mathcal{G}}) \otimes (U_{\mathcal{H}} \Lambda_{\mathcal{H}})) (U_{\mathcal{G}}^\top \otimes U_{\mathcal{H}}^\top) \\ &= (U_{\mathcal{G}} \Lambda_{\mathcal{G}} U_{\mathcal{G}}^\top) \otimes (U_{\mathcal{H}} \Lambda_{\mathcal{H}} U_{\mathcal{H}}^\top) \\ &= G \otimes H \end{aligned} \quad (2)$$

### B.2. Cartesian Graph Product

Now suppose  $x \circ y = x + y$ , it is not hard to see  $\Lambda_{\mathcal{G} \circ \mathcal{H}} = \Lambda_{\mathcal{G}} \otimes I_n + I_m \otimes \Lambda_{\mathcal{H}}$ . By similar analysis as above we have  $G \circ H = G \otimes I_n + I_m \otimes H = G \oplus H$ .

## C. Proof of Proposition 1

Optimization (7) is equivalent to (1) when  $\circ$  is the Cartesian graph product,  $C_0 = C_1 + 2C_2$  and  $\kappa(z) = \left(1 - \frac{C_2}{C_0} z\right)^{-1}$ .

---

<sup>1</sup>The “vec” operator concatenates the rows of a matrix into a single vector.

*Proof.* In this case,  $\kappa(\mathbf{G} \circ \mathbf{H}) = \left(\mathbf{I} - \frac{C_2}{C_0}(\mathbf{G} \oplus \mathbf{H})\right)^{-1}$ .

We assume that both  $\mathbf{G}$  and  $\mathbf{H}$  have been symmetrically normalized during preprocessing, i.e.  $\mathcal{L}_G = \mathbf{I} - \mathbf{G}$  and  $\mathcal{L}_H = \mathbf{I} - \mathbf{H}$ . Consider the regularization term in (1)

$$\begin{aligned}
 & \frac{C_0}{2} \text{vec}(\mathbf{F})^\top [\kappa(\mathbf{G} \circ \mathbf{H})]^{-1} \text{vec}(\mathbf{F}) \\
 &= \frac{C_0}{2} \text{vec}(\mathbf{F})^\top \left( \mathbf{I} - \frac{C_2}{C_0}(\mathbf{G} \oplus \mathbf{H}) \right) \text{vec}(\mathbf{F}) \\
 &= \frac{C_0}{2} \|\mathbf{F}\|_F^2 - \frac{C_2}{2} \text{vec}(\mathbf{F})^\top (\mathbf{G} \oplus \mathbf{H}) \text{vec}(\mathbf{F}) \\
 &= \frac{C_0}{2} \|\mathbf{F}\|_F^2 - \frac{C_2}{2} \text{vec}(\mathbf{F})^\top (\mathbf{G} \otimes \mathbf{I}_n + \mathbf{I}_m \otimes \mathbf{H}) \text{vec}(\mathbf{F}) \\
 &= \frac{C_0}{2} \|\mathbf{F}\|_F^2 - \frac{C_2}{2} \left[ \text{tr}(\mathbf{F}^\top \mathbf{G} \mathbf{F}) + \text{tr}(\mathbf{F} \mathbf{H} \mathbf{F}^\top) \right] \\
 &= \frac{C_1}{2} \|\mathbf{F}\|_F^2 + \frac{C_2}{2} \left[ 2\|\mathbf{F}\|_F^2 - \text{tr}(\mathbf{F}^\top \mathbf{G} \mathbf{F}) - \text{tr}(\mathbf{F} \mathbf{H} \mathbf{F}^\top) \right] \\
 &= \frac{C_1}{2} \|\mathbf{F}\|_F^2 + \frac{C_2}{2} \left[ \text{tr}(\mathbf{F}^\top (\mathbf{I} - \mathbf{G}) \mathbf{F}) + \text{tr}(\mathbf{F} (\mathbf{I} - \mathbf{H}) \mathbf{F}^\top) \right] \\
 &= \frac{C_1}{2} \|\mathbf{F}\|_F^2 + \frac{C_2}{2} \text{tr}(\mathbf{F}^\top \mathcal{L}_G \mathbf{F}) + \frac{C_2}{2} \text{tr}(\mathbf{F} \mathcal{L}_H \mathbf{F}^\top)
 \end{aligned}$$

Plugging back the above expression to optimization (1) closes the proof.  $\square$

## D. Proof of Lemma 1

If  $\circ$  defines a spectral graph product (SGP), then

$$\varphi_{\circ, \kappa}(\mathbf{F}) := \text{vec}^{-1} \left( [\kappa(\mathbf{G} \circ \mathbf{H})]^{-1} \text{vec}(\mathbf{F}) \right) = \mathbf{U}_G \left[ \Sigma_{\circ, \kappa} * \left( \mathbf{U}_G^\top \mathbf{F} \mathbf{U}_H \right) \right] \mathbf{U}_H^\top \quad (3)$$

where  $*$  is the matrix Hadamard (a.k.a. element-wise) product,  $\Sigma_{\circ, \kappa}$  is a  $m \times n$  matrix with each element defined as

$$[\Sigma_{\circ, \kappa}]_{ij} = 1 / \kappa([\lambda_G]_i \circ [\lambda_H]_j) \quad (4)$$

*Proof.* First, let us derive the eigendecomposition of  $[\kappa(\mathbf{G} \circ \mathbf{H})]^{-1}$ .

According to Definition 5,  $\mathbf{G} \circ \mathbf{H}$  has the eigendecomposition  $(\mathbf{U}_G \otimes \mathbf{U}_H) \Lambda_{\mathbf{G} \circ \mathbf{H}} (\mathbf{U}_G \otimes \mathbf{U}_H)^\top$  where  $[\Lambda_{\mathbf{G} \circ \mathbf{H}}]_{(i,j), (i,j)} = [\lambda_G]_i \circ [\lambda_H]_j$ . Since  $\kappa$  is a spectral transformation, we can directly apply it to the eigenvalues of  $\mathbf{G} \circ \mathbf{H}$ . Therefore

$$\begin{aligned}
 [\kappa(\mathbf{G} \circ \mathbf{H})]^{-1} &= \left[ \kappa \left( (\mathbf{U}_G \otimes \mathbf{U}_H) \Lambda_{\mathbf{G} \circ \mathbf{H}} (\mathbf{U}_G \otimes \mathbf{U}_H)^\top \right) \right]^{-1} \\
 &= \left[ (\mathbf{U}_G \otimes \mathbf{U}_H) \kappa(\Lambda_{\mathbf{G} \circ \mathbf{H}}) (\mathbf{U}_G \otimes \mathbf{U}_H)^\top \right]^{-1} \\
 &= (\mathbf{U}_G \otimes \mathbf{U}_H) [\kappa(\Lambda_{\mathbf{G} \circ \mathbf{H}})]^{-1} (\mathbf{U}_G^\top \otimes \mathbf{U}_H^\top) \\
 &= (\mathbf{U}_G \otimes \mathbf{U}_H) \text{diag}(\text{vec}(\Sigma_{\circ, \kappa})) (\mathbf{U}_G^\top \otimes \mathbf{U}_H^\top)
 \end{aligned} \quad (5)$$

The last equality follows the definition of  $\Sigma_{\circ, \kappa}$  in (4).

Now, let us derive the expression for  $\text{vec}(\varphi_{\circ, \kappa}(\mathbf{F}))$

$$\begin{aligned}
 \text{vec}(\varphi_{\circ, \kappa}(\mathbf{F})) &= [\kappa(\mathbf{G} \circ \mathbf{H})]^{-1} \text{vec}(\mathbf{F}) \\
 &= (\mathbf{U}_{\mathcal{G}} \otimes \mathbf{U}_{\mathcal{H}}) \text{diag}(\text{vec}(\boldsymbol{\Sigma}_{\circ, \kappa})) (\mathbf{U}_{\mathcal{G}}^{\top} \otimes \mathbf{U}_{\mathcal{H}}^{\top}) \text{vec}(\mathbf{F}) \\
 &= (\mathbf{U}_{\mathcal{G}} \otimes \mathbf{U}_{\mathcal{H}}) \text{diag}(\text{vec}(\boldsymbol{\Sigma}_{\circ, \kappa})) \text{vec}(\mathbf{U}_{\mathcal{G}}^{\top} \mathbf{F} \mathbf{U}_{\mathcal{H}}) \\
 &= (\mathbf{U}_{\mathcal{G}} \otimes \mathbf{U}_{\mathcal{H}}) \text{vec}[\boldsymbol{\Sigma}_{\circ, \kappa} * (\mathbf{U}_{\mathcal{G}}^{\top} \mathbf{F} \mathbf{U}_{\mathcal{H}})] \\
 &= \text{vec}(\mathbf{U}_{\mathcal{G}} [\boldsymbol{\Sigma}_{\circ, \kappa} * (\mathbf{U}_{\mathcal{G}}^{\top} \mathbf{F} \mathbf{U}_{\mathcal{H}})] \mathbf{U}_{\mathcal{H}}^{\top})
 \end{aligned} \tag{6}$$

The lemma follows by applying  $\text{vec}^{-1}$  to both sides of the equation above.  $\square$

## E. Proof of Theorem 1

For brevity we write  $\boldsymbol{\Sigma}_{\circ, \kappa}$  as  $\boldsymbol{\Sigma}$ .

Suppose  $\circ$  is a spectral graph product. Let  $\sum_{k=1}^{\text{rank}(\boldsymbol{\Sigma})} c_k \mathbf{u}_k \mathbf{v}_k^{\top}$  be the eigendecomposition of  $\boldsymbol{\Sigma}$ , and  $r(\mathbf{G}, \mathbf{u})$  be matrix  $\mathbf{G}$  with its eigenvalues replaced by some other vector  $\mathbf{u}$ . We have

$$\varphi_{\circ, \kappa}(\mathbf{F}) = \sum_{k=1}^{\text{rank}(\boldsymbol{\Sigma})} c_k r(\mathbf{G}, \mathbf{u}_k) \mathbf{F} r(\mathbf{H}, \mathbf{v}_k) \tag{7}$$

*Proof.* From Lemma 1 we have

$$\begin{aligned}
 \varphi_{\circ, \kappa}(\mathbf{F}) &= \mathbf{U}_{\mathcal{G}} \left[ \boldsymbol{\Sigma} * (\mathbf{U}_{\mathcal{G}}^{\top} \mathbf{F} \mathbf{U}_{\mathcal{H}}) \right] \mathbf{U}_{\mathcal{H}}^{\top} \\
 &= \mathbf{U}_{\mathcal{G}} \left[ \left( \sum_{k=1}^{\text{rank}(\boldsymbol{\Sigma})} c_k \mathbf{u}_k \mathbf{v}_k^{\top} \right) * (\mathbf{U}_{\mathcal{G}}^{\top} \mathbf{F} \mathbf{U}_{\mathcal{H}}) \right] \mathbf{U}_{\mathcal{H}}^{\top} \\
 &= \sum_{k=1}^{\text{rank}(\boldsymbol{\Sigma})} c_k \mathbf{U}_{\mathcal{G}} \left[ (\mathbf{u}_k \mathbf{v}_k^{\top}) * (\mathbf{U}_{\mathcal{G}}^{\top} \mathbf{F} \mathbf{U}_{\mathcal{H}}) \right] \mathbf{U}_{\mathcal{H}}^{\top} \\
 &= \sum_{k=1}^{\text{rank}(\boldsymbol{\Sigma})} c_k \mathbf{U}_{\mathcal{G}} \left[ \text{diag}(\mathbf{u}_k) (\mathbf{U}_{\mathcal{G}}^{\top} \mathbf{F} \mathbf{U}_{\mathcal{H}}) \text{diag}(\mathbf{v}_k) \right] \mathbf{U}_{\mathcal{H}}^{\top} \\
 &= \sum_{k=1}^{\text{rank}(\boldsymbol{\Sigma})} c_k \left( \mathbf{U}_{\mathcal{G}} \text{diag}(\mathbf{u}_k) \mathbf{U}_{\mathcal{G}}^{\top} \right) \mathbf{F} \left( \mathbf{U}_{\mathcal{H}} \text{diag}(\mathbf{v}_k) \mathbf{U}_{\mathcal{H}}^{\top} \right) \\
 &= \sum_{k=1}^{\text{rank}(\boldsymbol{\Sigma})} c_k r(\mathbf{G}, \mathbf{u}_k) \mathbf{F} r(\mathbf{H}, \mathbf{v}_k)
 \end{aligned} \tag{8}$$

$\square$

## F. Proof of Corollary 1

If there exists  $\sigma_1, \sigma_2$  such that for all  $x, y \in \mathbb{R}$ ,  $\frac{1}{\kappa(x \circ y)} \equiv \sigma_1(x) \sigma_2(y)$ . Then

$$\varphi_{\circ, \kappa}(\mathbf{F}) = \sigma_1(\mathbf{G}) \mathbf{F} \sigma_2(\mathbf{H}) \tag{9}$$

If there exists  $\sigma_1, \sigma_2$  such that for all  $x, y \in \mathbb{R}$ ,  $\frac{1}{\kappa(x \circ y)} \equiv \sigma_1(x) + \sigma_2(y)$ . Then

$$\varphi_{\circ, \kappa}(\mathbf{F}) = \sigma_1(\mathbf{G}) \mathbf{F} + \mathbf{F} \sigma_2(\mathbf{H}) \tag{10}$$

*Proof.* Define  $\sigma_1(\boldsymbol{\lambda}) := (\sigma_1(\lambda_1), \dots, \sigma_1(\lambda_m))$  and  $\sigma_2(\boldsymbol{\mu}) := (\sigma_2(\mu_1), \dots, \sigma_2(\mu_n))$ . Notice

- $r(\mathbf{G}, \mathbf{1}) \equiv \mathbf{1}$ .
- $r(\mathbf{G}, \sigma(\mathbf{u})) \equiv \sigma(\mathbf{G})$  if  $\mathbf{u}$  is the eigenvalues of  $\mathbf{G}$ .

The first condition  $\frac{1}{\kappa(x \circ y)} \equiv \sigma_1(x) \sigma_2(y)$  implies that  $\boldsymbol{\Sigma} = \mathbf{1} \cdot \sigma_1(\boldsymbol{\lambda}) \sigma_2(\boldsymbol{\mu})^\top$ , and the conclusion follows Theorem 1 with  $\text{rank}(\boldsymbol{\Sigma}) = 1$ ,  $c_1 = 1$ ,  $\mathbf{u}_1 = \sigma_1(\boldsymbol{\lambda})$  and  $\mathbf{v}_1 = \sigma_2(\boldsymbol{\mu})$ .

The second condition  $\frac{1}{\kappa(x \circ y)} \equiv \sigma_1(x) + \sigma_2(y)$  implies that  $\boldsymbol{\Sigma} = \mathbf{1} \cdot \sigma_1(\boldsymbol{\lambda}) \mathbf{1}_n^\top + \mathbf{1} \cdot \mathbf{1}_m \sigma_2(\boldsymbol{\mu})^\top$ . The conclusion follows Theorem 1 with  $\text{rank}(\boldsymbol{\Sigma}) = 2$ ,  $c_1 = c_2 = 1$ ,  $\mathbf{u}_1 = \sigma_1(\boldsymbol{\lambda})$ ,  $\mathbf{v}_1 = \mathbf{1}_n$ ,  $\mathbf{u}_2 = \mathbf{1}_m$  and  $\mathbf{v}_2 = \sigma_2(\boldsymbol{\mu})$ . □
